# Supplementary material for: Multi-objective optimization of the cavitation generation unit structure of an advanced rotational hydrodynamic cavitation reactor
Source: PubMed Central journal article supplement — Ultrason Sonochem. 2021 Sep 28;80:105771. doi: 10.1016/j.ultsonch.2021.105771 (PMC8551246; doi:10.1016/j.ultsonch.2021.105771), 2021-09-28
Supplement: mmc1.pdf [file mmc1.pdf]

# Multi-objective Optimization of the Cavitation Generation Unit Structure of an Advanced Rotational Hydrodynamic Cavitation Reactor

Xun Sun, Ze Yang, Yang Tao, Xuesong Wei\*, Grzegorz Boczkaj, Joon Yong Yoon,  
Xiaoxu Xuan\* and Songying Chen

**Corresponding authors:** Xuesong Wei, [weixuesong@sdu.edu.cn](mailto:weixuesong@sdu.edu.cn)

Xiaoxu Xuan, [xiaoxuxuan@sdu.edu.cn](mailto:xiaoxuxuan@sdu.edu.cn)

Key Laboratory of High Efficiency and Clean Mechanical Manufacture, Ministry of Education,  
School of Mechanical Engineering, Shandong University, Jinan 250061, China  
National Demonstration Center for Experimental Mechanical Engineering Education, Shandong  
University, Jinan 250061, China

## Content

|                                                                                                                                                                                    |   |
|------------------------------------------------------------------------------------------------------------------------------------------------------------------------------------|---|
| <b>Table S1</b> CCD results for the four design variables.....                                                                                                                     | 2 |
| <b>Table S2</b> ANOVA for the response surface regression of the total vapor volume (DF: degree of freedom, Adj SS: adjusted sums of squares, Adj MS: Adjusted means squares)..... | 3 |
| <b>Table S3</b> ANOVA for the response surface regression of the total torque, corresponding to Table S2. ....                                                                     | 4 |
| <b>Fig. S1</b> 2D contour and 3D response surface plots for the total vapor volume.....                                                                                            | 5 |
| <b>Fig. S2</b> 2D contour and 3D response surface plots for the total torque. ....                                                                                                 | 6 |
| <b>Fig. S3</b> Correlation table of the design variables and objectives for (a) all points and (b) Pareto Front.....                                                               | 7 |
| <b>Fig. S4</b> selected optimized solution from the Pareto front. ....                                                                                                             | 8 |

**Table S1** CCD results for the four design variables.

| No. | Point  | Design variable |          |          |                       | Objective                                    |                        |
|-----|--------|-----------------|----------|----------|-----------------------|----------------------------------------------|------------------------|
|     |        | $D$ (mm)        | $s$ (mm) | $h$ (mm) | $\theta$ ( $^\circ$ ) | $V_{vapor}$ ( $\times 10^{-8} \text{ m}^3$ ) | $\overline{M}_z$ (N·m) |
| 1   | cube   | 9               | 1.5      | 1.5      | 6.25                  | 3.802                                        | 1.149                  |
| 2   | cube   | 11              | 1.5      | 1.5      | 6.25                  | 10.709                                       | 2.039                  |
| 3   | cube   | 9               | 2.5      | 1.5      | 6.25                  | 0.702                                        | 0.968                  |
| 4   | cube   | 11              | 2.5      | 1.5      | 6.25                  | 7.077                                        | 1.822                  |
| 5   | cube   | 9               | 1.5      | 2.5      | 6.25                  | 3.046                                        | 0.848                  |
| 6   | cube   | 11              | 1.5      | 2.5      | 6.25                  | 8.507                                        | 1.522                  |
| 7   | cube   | 9               | 2.5      | 2.5      | 6.25                  | 0.601                                        | 0.644                  |
| 8   | cube   | 11              | 2.5      | 2.5      | 6.25                  | 2.865                                        | 1.352                  |
| 9   | cube   | 9               | 1.5      | 1.5      | 18.75                 | 6.344                                        | 1.336                  |
| 10  | cube   | 11              | 1.5      | 1.5      | 18.75                 | 19.882                                       | 2.031                  |
| 11  | cube   | 9               | 2.5      | 1.5      | 18.75                 | 2.263                                        | 1.188                  |
| 12  | cube   | 11              | 2.5      | 1.5      | 18.75                 | 8.482                                        | 2.310                  |
| 13  | cube   | 9               | 1.5      | 2.5      | 18.75                 | 4.586                                        | 0.852                  |
| 14  | cube   | 11              | 1.5      | 2.5      | 18.75                 | 15.079                                       | 1.304                  |
| 15  | cube   | 9               | 2.5      | 2.5      | 18.75                 | 1.859                                        | 0.777                  |
| 16  | cube   | 11              | 2.5      | 2.5      | 18.75                 | 3.897                                        | 1.759                  |
| 17  | star   | 8               | 2        | 2        | 12.5                  | 1.302                                        | 0.640                  |
| 18  | star   | 12              | 2        | 2        | 12.5                  | 18.213                                       | 2.064                  |
| 19  | star   | 10              | 1        | 2        | 12.5                  | 15.004                                       | 0.774                  |
| 20  | star   | 10              | 3        | 2        | 12.5                  | 2.307                                        | 1.149                  |
| 21  | star   | 10              | 2        | 1        | 12.5                  | 8.404                                        | 1.876                  |
| 22  | star   | 10              | 2        | 3        | 12.5                  | 1.252                                        | 0.840                  |
| 23  | star   | 10              | 2        | 2        | 0                     | 2.722                                        | 1.250                  |
| 24  | star   | 10              | 2        | 2        | 25                    | 8.103                                        | 1.644                  |
| 25  | center | 10              | 2        | 2        | 12.5                  | 4.396                                        | 1.371                  |

**Table S2** ANOVA for the response surface regression of the total vapor volume (DF: degree of freedom, Adj SS: adjusted sums of squares, Adj MS: Adjusted means squares).

| Source            | DF | Adj SS  | Adj MS  | F-Value | P-Value |
|-------------------|----|---------|---------|---------|---------|
| Model             | 14 | 733.636 | 52.403  | 36.59   | 0.000   |
| Linear            | 4  | 617.365 | 154.341 | 107.78  | 0.000   |
| $x_1$             | 1  | 316.224 | 316.224 | 220.83  | 0.000   |
| $x_2$             | 1  | 201.875 | 201.875 | 140.98  | 0.000   |
| $x_3$             | 1  | 45.729  | 45.729  | 31.93   | 0.000   |
| $x_4$             | 1  | 53.537  | 53.537  | 37.39   | 0.000   |
| Square            | 4  | 59.915  | 14.979  | 10.46   | 0.000   |
| $x_1 * x_1$       | 1  | 40.161  | 40.161  | 28.05   | 0.000   |
| $x_2 * x_2$       | 1  | 23.659  | 23.659  | 16.52   | 0.001   |
| $x_3 * x_3$       | 1  | 0.064   | 0.064   | 0.04    | 0.835   |
| $x_4 * x_4$       | 1  | 0.280   | 0.280   | 0.20    | 0.664   |
| 2-Way Interaction | 6  | 56.356  | 9.393   | 6.56    | 0.001   |
| $x_1 * x_2$       | 1  | 23.772  | 23.772  | 16.60   | 0.001   |
| $x_1 * x_3$       | 1  | 10.215  | 10.215  | 7.13    | 0.017   |
| $x_1 * x_4$       | 1  | 7.952   | 7.952   | 5.55    | 0.032   |
| $x_2 * x_3$       | 1  | 0.003   | 0.003   | 0.00    | 0.964   |
| $x_2 * x_4$       | 1  | 13.269  | 13.269  | 9.27    | 0.008   |
| $x_3 * x_4$       | 1  | 1.145   | 1.145   | 0.80    | 0.384   |
| Error             | 16 | 22.912  | 1.432   |         |         |
| Lack-of-Fit       | 10 | 22.912  | 2.291   | *       | *       |
| Pure Error        | 6  | 0.000   | 0.000   |         |         |
| Total             | 30 | 756.548 |         |         |         |

$S = 1.19665$ ,  $R^2 = 96.97\%$ , Adjusted  $R^2 = 94.32\%$ , Predicted  $R^2 = 82.56\%$ .

**Table S3** ANOVA for the response surface regression of the total torque, corresponding to Table S2.

| Source            | DF | Adj SS  | Adj MS  | F-Value | P-Value |
|-------------------|----|---------|---------|---------|---------|
| Model             | 14 | 5.6559  | 0.40399 | 34.95   | 0.000   |
| Linear            | 4  | 5.14939 | 1.28735 | 111.37  | 0.000   |
| $x_1$             | 1  | 3.54437 | 3.54437 | 306.62  | 0.000   |
| $x_2$             | 1  | 0.00998 | 0.00998 | 0.86    | 0.367   |
| $x_3$             | 1  | 1.42812 | 1.42812 | 123.55  | 0.000   |
| $x_4$             | 1  | 0.16693 | 0.16693 | 14.44   | 0.002   |
| Square            | 4  | 0.28667 | 0.07167 | 6.20    | 0.003   |
| $x_1 * x_1$       | 1  | 0.00287 | 0.00287 | 0.25    | 0.625   |
| $x_2 * x_2$       | 1  | 0.21918 | 0.21918 | 18.96   | 0.000   |
| $x_3 * x_3$       | 1  | 0.00381 | 0.00381 | 0.33    | 0.574   |
| $x_4 * x_4$       | 1  | 0.0327  | 0.0327  | 2.83    | 0.112   |
| 2-Way Interaction | 6  | 0.21984 | 0.03664 | 3.17    | 0.030   |
| $x_1 * x_2$       | 1  | 0.05711 | 0.05711 | 4.94    | 0.041   |
| $x_1 * x_3$       | 1  | 0.03477 | 0.03477 | 3.01    | 0.102   |
| $x_1 * x_4$       | 1  | 0.00098 | 0.00098 | 0.09    | 0.774   |
| $x_2 * x_3$       | 1  | 0.00464 | 0.00464 | 0.40    | 0.535   |
| $x_2 * x_4$       | 1  | 0.10264 | 0.10264 | 8.88    | 0.009   |
| $x_3 * x_4$       | 1  | 0.01969 | 0.01969 | 1.70    | 0.210   |
| Error             | 16 | 0.18495 | 0.01156 |         |         |
| Lack-of-Fit       | 10 | 0.18495 | 0.01849 | *       | *       |
| Pure Error        | 6  | 0       | 0       |         |         |
| Total             | 30 | 5.84085 |         |         |         |

$S = 0.107515$ ,  $R^2 = 96.83\%$ , Adjusted  $R^2 = 94.06\%$ , Predicted  $R^2 = 81.76\%$ .

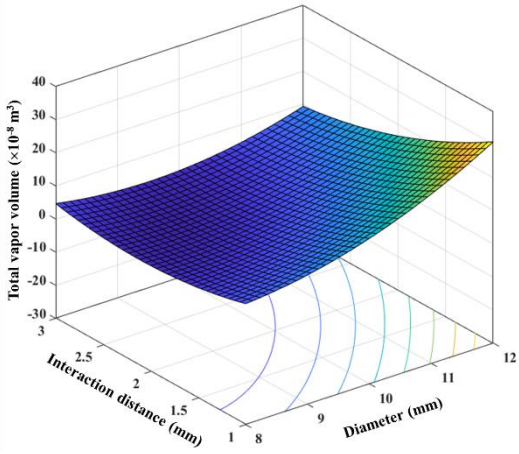

(a)  $D$  vs.  $s$  ( $h = 2$  mm,  $\theta = 12.5^\circ$ )

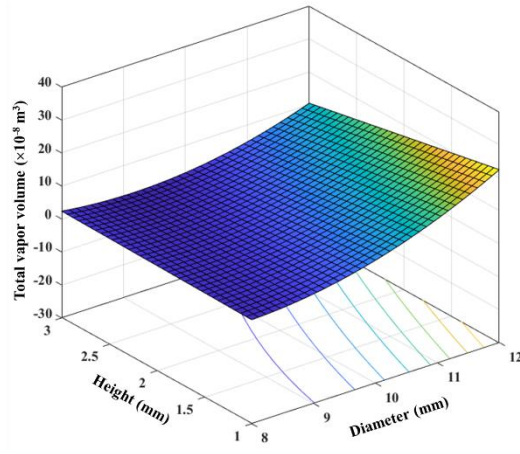

(b)  $D$  vs.  $h$  ( $s = 2$  mm,  $\theta = 12.5^\circ$ )

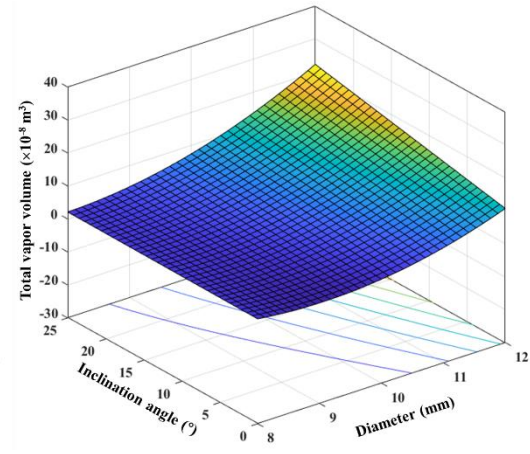

(c)  $D$  vs.  $\theta$  ( $s = 2$  mm,  $h = 2$  mm)

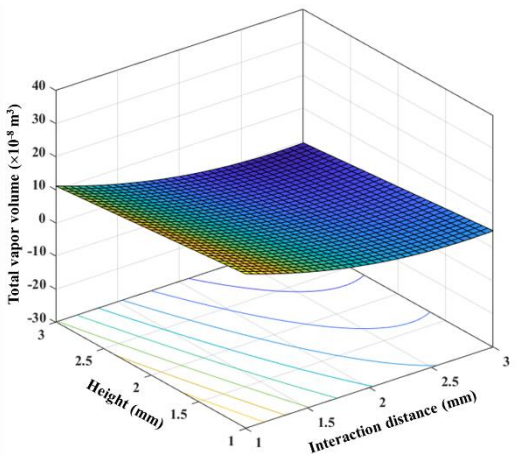

(e)  $s$  vs.  $h$  ( $D = 10$  mm,  $\theta = 12.5^\circ$ )

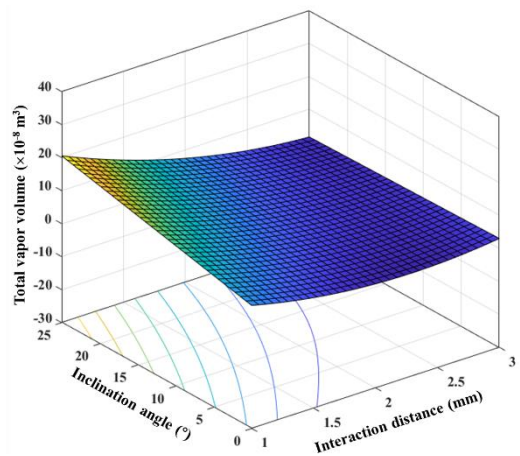

(f)  $s$  vs.  $\theta$  ( $D = 10$  mm,  $h = 2$  mm)

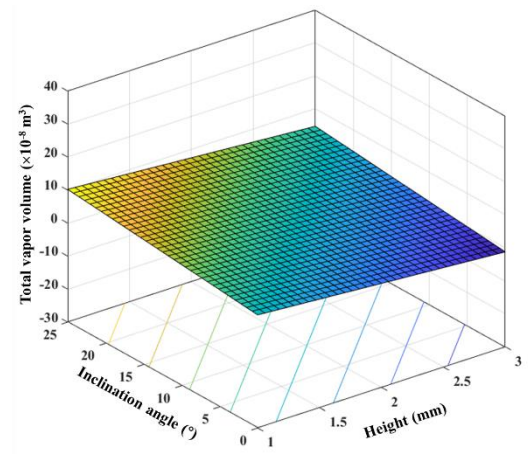

(g)  $h$  vs.  $\theta$  ( $D = 10$  mm,  $s = 2$  mm)

**Fig. S1** 2D contour and 3D response surface plots for the total vapor volume.

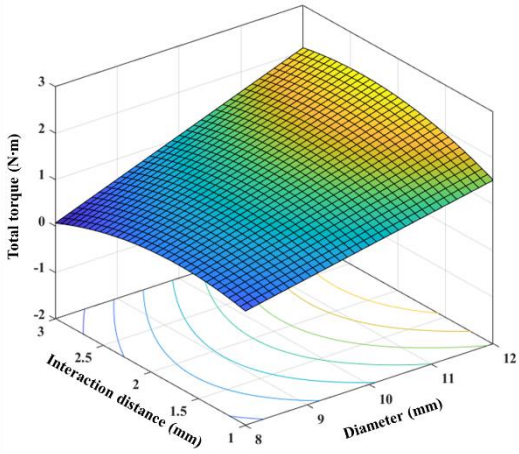

(a)  $D$  vs.  $s$  ( $h = 2$  mm,  $\theta = 12.5^\circ$ )

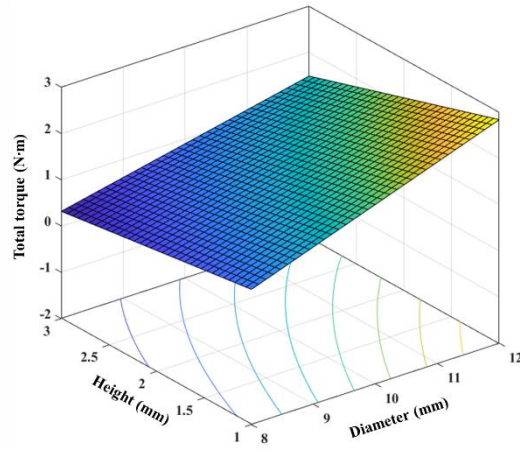

(b)  $D$  vs.  $h$  ( $s = 2$  mm,  $\theta = 12.5^\circ$ )

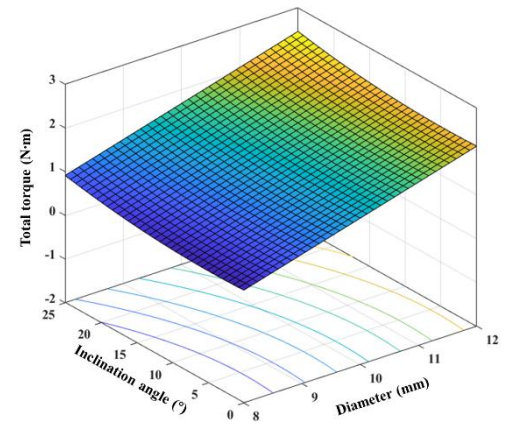

(c)  $D$  vs.  $\theta$  ( $s = 2$  mm,  $h = 2$  mm)

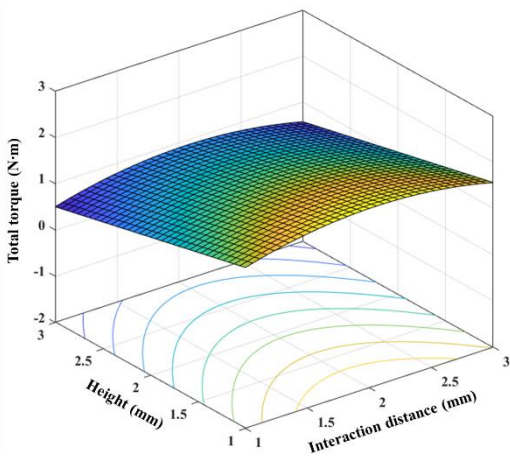

(e)  $s$  vs.  $h$  ( $D = 10$  mm,  $\theta = 12.5^\circ$ )

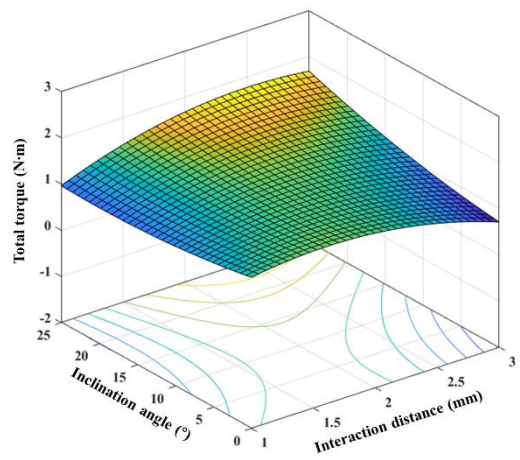

(f)  $s$  vs.  $\theta$  ( $D = 10$  mm,  $h = 2$  mm)

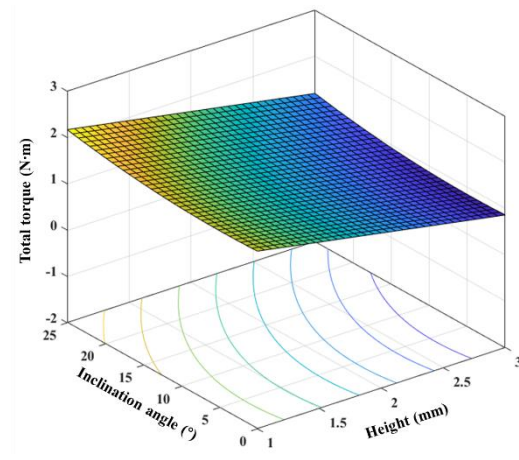

(g)  $h$  vs.  $\theta$  ( $D = 10$  mm,  $s = 2$  mm)

**Fig. S2** 2D contour and 3D response surface plots for the total torque.

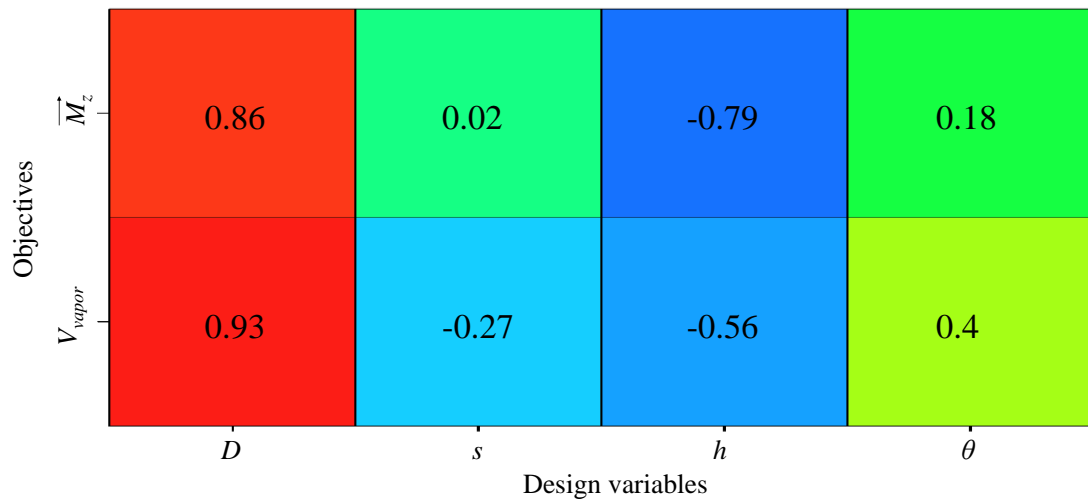

(a)

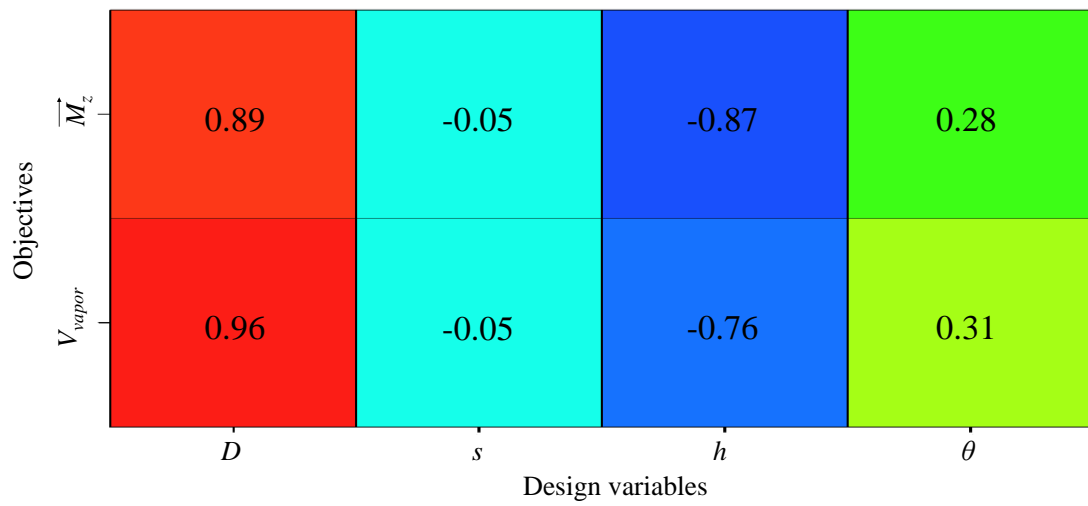

(b)

**Fig. S3** Correlation table of the design variables and objectives for (a) all points and (b) Pareto Front.

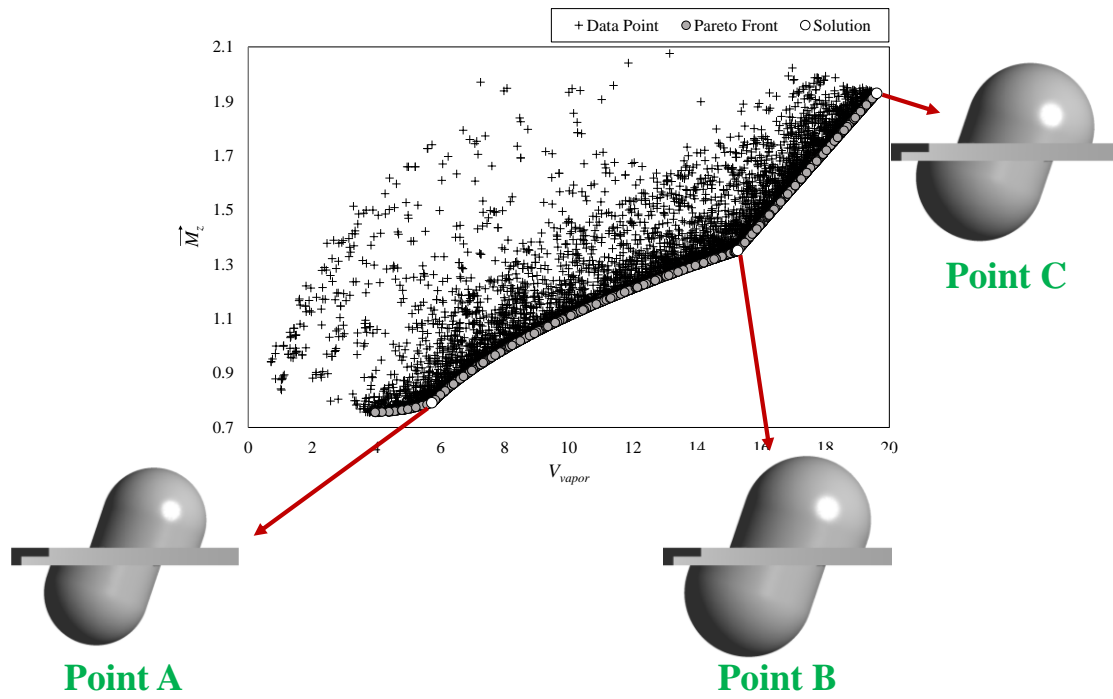

**Fig. S4** selected optimized solution from the Pareto front.
